# Supplementary material for: Repetitive Biomimetic Self-healing of Ca2+-Induced Nanocomposite Protein Hydrogels
Source: PubMed Central journal article supplement (PMC4992862; doi:10.1038/srep30804), 2016-08-22
Supplement: srep30804-s1.pdf [file srep30804-s1.pdf]

Supplementary Information

**Repetitive Biomimetic Self-healing of Ca<sup>2+</sup>-Induced  
Nanocomposite Protein Hydrogels**

Jun Chen<sup>1</sup>, Qiuchen Dong<sup>1</sup>, Xiaoyu Ma<sup>1</sup>, Tai-Hsi Fan<sup>2</sup>, and Yu Lei<sup>1, 3\*</sup>

<sup>1</sup>Department of Biomedical Engineering, University of Connecticut, Storrs, CT 06269, USA

<sup>2</sup>Department of Mechanical Engineering, University of Connecticut, Storrs, CT 06269, USA

<sup>3</sup>Department of Chemical and Biomolecular Engineering, University of Connecticut, Storrs, CT 06269, USA

\*Corresponding author

1. Calcium BSA hydrogel in different chemical environment

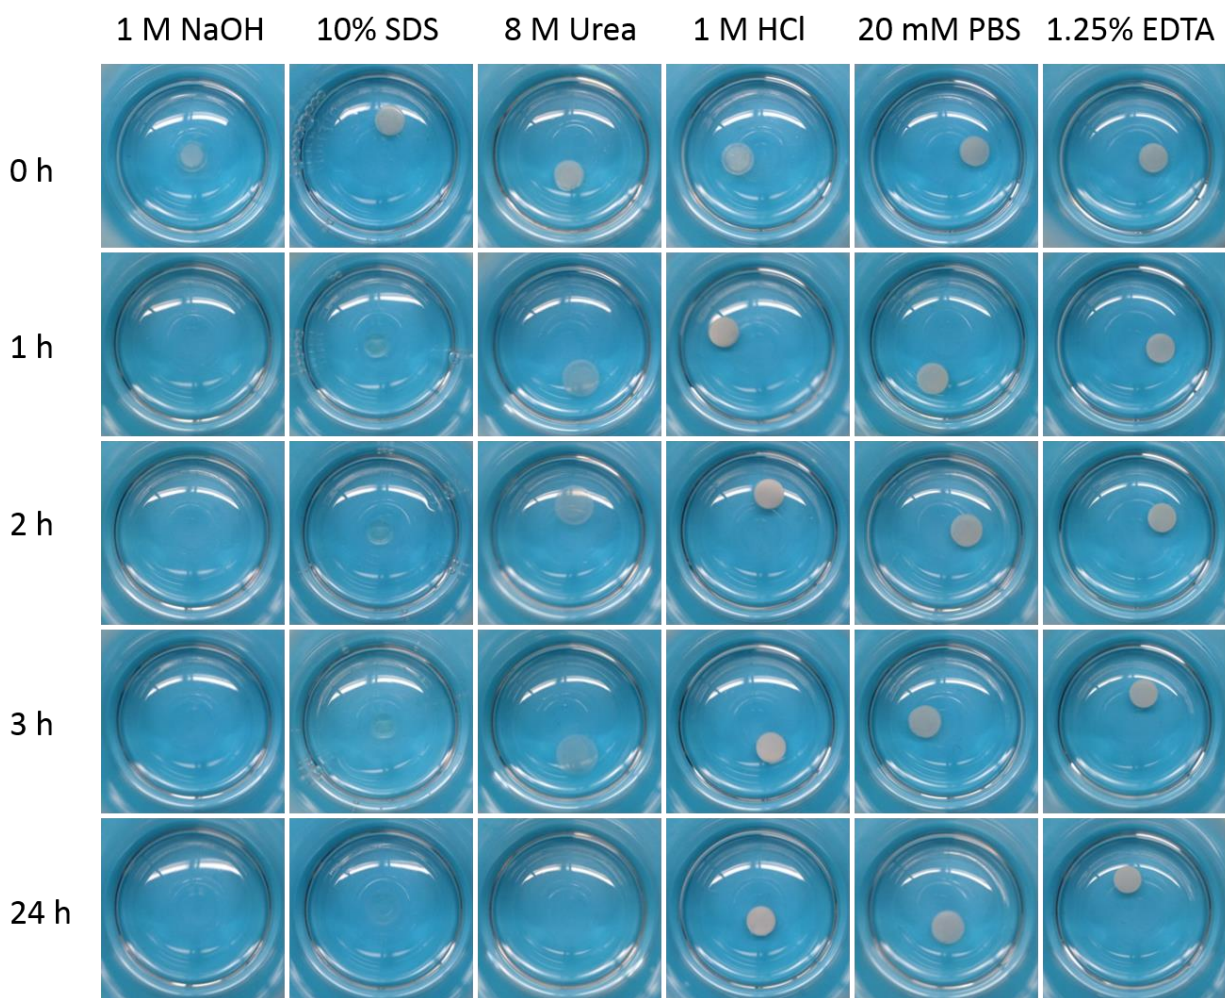

Supplementary Figure S1 | Time-dependent optical images of the as-prepared protein hydrogels in different chemical environment.

## 2. SEM images of calcium BSA Hydrogel

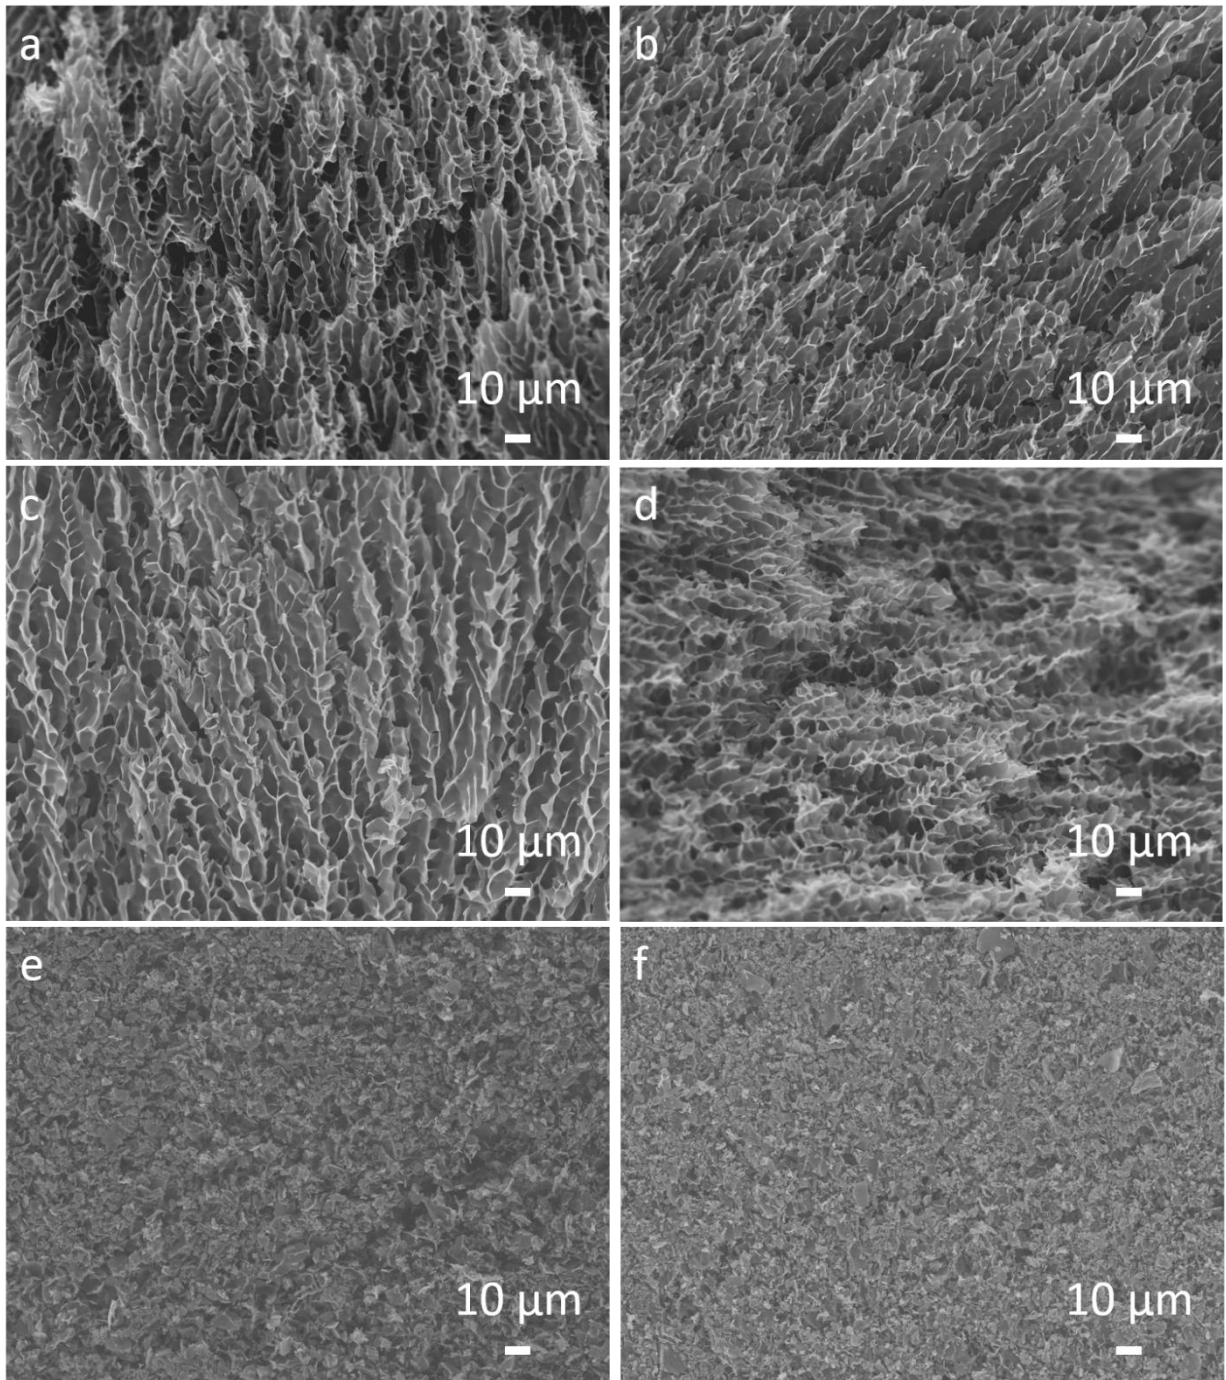

Supplementary Figure S2 | (a to f) SEM images of lyophilized calcium BSA hydrogels with 10, 15, 20, 30, 40, and 50 mM of  $\text{Ca}^{2+}$ , respectively.

### 3. Tensile test for quantitative self-healing evaluation

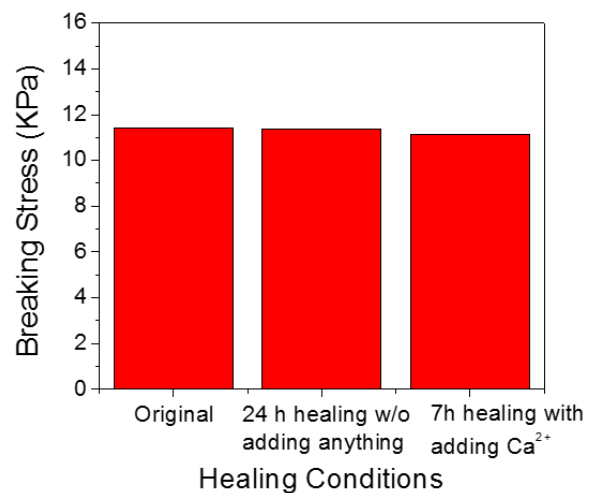

Supplementary Figure S3 | Breaking stress of 20 mM Ca<sup>2+</sup> induced 10% BSA hydrogel: original, healed for 24 hrs at room temperature without adding anything, and healed with appearance of physiological Ca<sup>2+</sup> concentration for 7 hrs at room temperature, respectively.
